# Supplementary material for: Volume and Tempo: Cortical Excitability and Trial-to-Trial Consistency of Auditory Responses Distinguish Psychosis Biotypes
Source: Research Square preprint supplement (doi:10.21203/rs.3.rs-9336633/v1), 2026-05-19
Supplement: Supplementary file 1 [file 3fc964772ab6d89f9ea2e54f.docx]

**SUPPLEMENTARY METHODS**

To request access to B-SNIP data used in this manuscript, visit https://nda.nih.gov/. There is a “Get Data” tab at the top of the main page, under which is found a “Request Data Access” link. Request psychosis and healthy subject data, and the below described biomarker data, from:

B-SNIP1 (https://nda.nih.gov/edit_collection.html?id=2274)

B-SNIP2 (https://nda.nih.gov/edit_collection.html?id=2165)

PARDIP (<https://nda.nih.gov/edit_collection.html?id=2126>)

Data collection strategies were the same for B-SNIP1 1-5 and the replication samples 6-9. Data analyses were also the same for all biomarkers. In some instances, this mean re-scoring B-SNIP1 data to match updated procedures. Any differences between B-SNIP1 and replication samples are identified in what

follows by underlined text, with a brief explanation.

**Recruitment**

B-SNIP recruitment sites were in Athens GA (replication sample only), Baltimore MD (BSNIP1 only), Boston MA, Chicago IL (University of Illinois-Chicago for B-SNIP1 and University of Chicago for the replication sample), Dallas TX, Detroit MI (B-SNIP1 only), and Hartford CT. Each site recruited cases with possible with schizophrenia, schizoaffective disorder, or bipolar disorder with psychosis, and healthy persons for comparison. Psychosis cases were clinically stable and in a non- acute symptom state. The broad geographical span of B-SNIP facilitated enrichment of the study group by local geographical characteristics. Sites used a combination of newspaper, community, and mental health treatment facility advertising, with the groups similarly recruited across all sites. These subjects were a research sample; nonetheless, the large study numbers and broad geographical recruitment enhance the generalizability of data from the B-SNIP cohort. This strategy generated a more inclusive study group than is typical in studies focusing on specific disorders, with the aim of having a representative sample of the spectrum of psychosis. Psychosis cases were limited to schizophrenia, schizoaffective disorder, and bipolar disorder with psychosis because these are the diagnoses with the highest prevalence of psychosis and studying more diagnostic categories was deemed unfeasible as a first approach.

The extensive clinical information on each participant was reviewed in a best-estimate diagnostic meeting with at least two experienced research clinicians to establish the consensus diagnosis. Cross-site diagnostic conference calls were carried out monthly; they were chaired by two senior primary investigators and attended by the 2–4 trained clinical assessors at each site. At study start, there was a face-to-face training session for all raters, with a requirement for reliability above 0.85. Each month, diagnostic conferences were held with in-depth diagnostic discussions. Each year, rater training was repeated to reestablish reliability. See Tamminga et al. 10 for complete details.

**Procedures and Analyses**

Following verification of study eligibility, subjects that met study inclusion criteria were scheduled for laboratory biomarker testing. Testing took place over 2-3 days at the recruiting sites. Recording and testing conditions were equivalent and stimulus presentation and recording equipment were identical across sites. Experimenters across sites also were trained and monitored to ensure identical laboratory data collection procedures across sites. As a result, there were no site effects that

influenced group comparisons on any laboratory biomarker measure for either B-SNIP1 or replication samples.

**Laboratory tasks for Biotype determination**

The EEG/ERP procedures described here were updated from our original Biotypes paper 11. All data were scored using equivalent procedures as described below and as detailed in replication sample publications 6-9, 12. Age and sex-adjusted data were used for all biomarkers based on the procedure described in Dukart et al 13.

**EEG Recording**

Recording EEG were continuously recorded from 64 Ag/AgCl sensors (impedance < 5KΩ; Quik-Cap, Compumedics Neuroscan, El Paso, TX), positioned according to the standard 10-10 EEG system plus mastoids and CB1/2 locations to provide sampling below the canthomeatal line, with nose reference and forehead ground. Recordings were amplified (×12,500) and digitized (1000 Hz) using Neuroscan Acquire and Synamps2 recording systems (Compumedics Neuroscan).

**EEG Data Pre-Processing**

Raw EEG data were inspected for bad sensors and artifacts. Bad sensors were interpolated (<5% of all sensors for any subject) using spherical spline interpolation (BESA 5.3; MEGIS Software, Grafelfing, Germany). Data were converted to an average reference and digitally band-pass filtered from 0.5–55 Hz (zero phase filter; rolloff: 6 and 48 dB/octave, respectively). Blink and cardiac artifacts identified using independent components analysis were removed (EEGLAB 9.0; 19).

**Spatio-Temporal Data Reduction**

To maximize use of available spatial, temporal, and oscillatory information in the evoked auditory response, a frequency-wise PCA (Covariance matrix, Promax Rotation, Kappa 3 with Kaiser normalization) of evoked power 4, 5, 8 was first conducted across all subjects to empirically derive frequency bands for analysis. This was done combining single trial information for both paired-stimuli and oddball tasks. The outcome illustrated that three bands of LOW (3–17 Hz), BETA (18–32 Hz), and GAMMA (33–55 Hz) efficiently captured the oscillatory information for individual trials. This combined approach was selected to standardize the frequency space across both tasks and facilitate direct comparison of outcomes. Data for individual STP and ITC outcomes were binned into 20 msec segments. To adjust for age effects, healthy aging effects were modeled by regressing time-bin amplitudes on age for healthy subjects. When beta coefficients for age effects were significant (p < .05), data for all subjects within the time bin were adjusted by removing the predicted impact of age on waveform amplitude prior to group comparisons 13.

**Auditory Paired Stimuli Task**

Psychosis and healthy analyses generally followed procedures established in Hamm et al. 5 and Clementz et al. 11 Minor modifications from BSNIP1 publications ensured standardized data quality between projects 8. Changes to the scoring procedures were primarily to frequency domain quantification and were made to simplify the analysis steps to improve the ease of replication and verification by other laboratories. The procedures described in Parker et al. 8 were used for this report.

**Stimuli.** Recording conditions were equivalent and stimulus presentation and recording equipment identical across sites. While seated in a sound and electrically shielded booth (ambient sound = 61–63 dB; luminance = 0.11–0.12 foot-candles), subjects passively listened to 120-150 (BSNIP1: 150, Replication Sample: 120) binaural broadband auditory click pairs (4 msec duration at 75 dB sound pressure level; 500 msec inter-click interval) occurring an average of every 9.5 sec (9–10

sec inter-pair interval) and delivered through headphones. Participants who were smokers refrained from smoking 1 hr prior to testing.

**Auditory Oddball Task**

Analyses generally followed procedures established in Ethridge et al. 3 and Clementz et al. 11 and were applied to all subjects in this paper. Minor modifications from B-SNIP1 publications ensured standardized data quality control between projects 9. Like with the paired-stimuli analyses, changes to the scoring procedures were primarily to frequency domain quantification and were made to simplify the analysis steps to improve the ease of replication and verification by other laboratories. The procedures described in Parker et al. 9 were used for this report.

**Stimuli.** Recording conditions were equivalent and stimulus presentation and recording equipment were identical across sites. Seated in a sound and electrically shielded booth (ambient sound 5 61–63 dB; luminance 5 .11–.12 foot-candle), subjects listened to tones delivered through headphones. Stimuli were 567 standard (1000 Hz) and 100 target (1500 Hz) tones presented in pseudorandom order (1300 msec inter-trial interval). Subjects were asked to press a button when a target was detected. Subjects refrained from smoking 1 hour before testing.

**References**

2. Reilly JL, Frankovich K, Hill S, et al. Elevated antisaccade error rate as an intermediate

phenotype for psychosis across diagnostic categories. *Schizophr Bull*. Sep 2014;40(5):1011-21.

doi:10.1093/schbul/sbt132

3. Ethridge LE, Soilleux M, Nakonezny PA, et al. Behavioral response inhibition in psychotic

disorders: diagnostic specificity, familiality and relation to generalized cognitive deficit.

*Schizophr Res*. Nov 2014;159(2-3):491-8. doi:10.1016/j.schres.2014.08.025

4. Ethridge LE, Hamm JP, Pearlson GD, et al. Event-related potential and time-frequency

endophenotypes for schizophrenia and psychotic bipolar disorder. *Biol Psychiatry*. Jan 15

2015;77(2):127-36. doi:10.1016/j.biopsych.2014.03.032

5. Hamm JP, Ethridge LE, Boutros NN, et al. Diagnostic specificity and familiality of early

versus late evoked potentials to auditory paired stimuli across the schizophrenia-bipolar

psychosis spectrum. *Psychophysiology*. Apr 2014;51(4):348-57. doi:10.1111/psyp.12185

8. Parker DA, Trotti RL, McDowell JE, et al. Auditory paired-stimuli responses across the

psychosis and bipolar spectrum and their relationship to clinical features. *Biomarkers in*

*Neuropsychiatry*. 2020;3:100014. doi:https://doi.org/10.1016/j.bionps.2020.100014

9. Parker D, Trotti R, McDowell J, et al. Auditory Oddball Responses Across the

Schizophrenia-Bipolar Spectrum and their Relationship to Cognitive and Clinical Features. .

*American Journal of Psychiatry*. 2021;in press

10. Tamminga CA, Ivleva EI, Keshavan MS, et al. Clinical phenotypes of psychosis in the

Bipolar-Schizophrenia Network on Intermediate Phenotypes (B-SNIP). *Am J Psychiatry*. Nov

2013;170(11):1263-74. doi:10.1176/appi.ajp.2013.12101339

11. Clementz BA, Sweeney JA, Hamm JP, et al. Identification of Distinct Psychosis Biotypes

Using Brain-Based Biomarkers. *Am J Psychiatry*. Apr 01 2016;173(4):373-84.

doi:10.1176/appi.ajp.2015.14091200

13. Dukart J, Schroeter ML, Mueller K, Initiative AsDN. Age correction in dementia--matching

to a healthy brain. *PLoS One*. 2011;6(7):e22193. doi:10.1371/journal.pone.0022193

18. McDowell JE, Clementz BA. The effect of fixation condition manipulations on antisaccade

performance in schizophrenia: studies of diagnostic specificity. *Exp Brain Res*. Jun

1997;115(2):333-44.

19. Delorme A, Makeig S. EEGLAB: an open source toolbox for analysis of single-trial EEG

dynamics including independent component analysis. *J Neurosci Methods*. Mar 2004;134(1):9-

21. doi:10.1016/j.jneumeth.2003.10.009

20. Carroll CA, Kieffaber PD, Vohs JL, O'Donnell BF, Shekhar A, Hetrick WP. Contributions of

spectral frequency analyses to the study of P50 ERP amplitude and suppression in bipolar

disorder with or without a history of psychosis. *Bipolar Disord*. Nov 2008;10(7):776-87.

doi:10.1111/j.1399-5618.2008.00622.x

21. Dien J, Khoe W, Mangun GR. Evaluation of PCA and ICA of simulated ERPs: Promax vs.

Infomax rotations. *Hum Brain Mapp*. Aug 2007;28(8):742-63. doi:10.1002/hbm.20304

22. Ethridge LE, Hamm JP, Shapiro JR, et al. Neural activations during auditory oddball

processing discriminating schizophrenia and psychotic bipolar disorder. *Biol Psychiatry*. Nov 1

2012;72(9):766-74. doi:10.1016/j.biopsych.2012.03.034

23. Hamm JP, Dyckman KA, McDowell JE, Clementz BA. Pre-cue fronto-occipital alpha phase

and distributed cortical oscillations predict failures of cognitive control. *J Neurosci*. May

2012;32(20):7034-41. doi:10.1523/JNEUROSCI.5198-11.2012

24. Hamm JP, Ethridge LE, Shapiro JR, et al. Spatiotemporal and frequency domain analysis

of auditory paired stimuli processing in schizophrenia and bipolar disorder with psychosis.

*Psychophysiology*. Apr 2012;49(4):522-30. doi:10.1111/j.1469-8986.2011.01327.x

29. Rubin DB. *Multiple imputation for nonresponse in surveys*. Wiley series in probability and

mathematical statistics Applied probability and statistics,. Wiley; 1987:xxix, 258 p.

30. Tibshirani R, Walther G, Hastie T. Estimating the number of clusters in a data set via the

gap statistic. *Journal of the Royal Statistical Society Series B-Statistical Methodology*.

2001;63:411-423. doi:Doi 10.1111/1467-9868.00293

31. Norusis MJ. *SPSS 15.0 advanced statistical procedures companion*. Prentice Hall; 2007:xiv,

418 pages.

32. Tkaczynski A. Segmentation Using Two-Step Cluster Analysis. In: Dietrich T, Rundle-

Thiele S, Kubacki K, eds. *Segmentation in Social Marketing: Process, Methods and Application*.

Springer Singapore; 2017:109-125.

33. Mothi SS, Sudarshan M, Tandon N, et al. Machine learning improved classification of

psychoses using clinical and biological stratification: Update from the bipolar-schizophrenia

network for intermediate phenotypes (B-SNIP). *Schizophr Res*. May 25

2018;doi:10.1016/j.schres.2018.04.037
